# Supplementary material for: Tumor Endothelial Cells-Associated Integrin Alpha-6 as a Promising Biomarker for Early Detection and Prognosis of Hepatocellular Carcinoma
Source: MDPI journal article supplement (doi:10.3390/cancers15164156), 2023-08-17
Supplement: s1 [file s1]

# Tumor Endothelial Cells-Associated Integrin Alpha-6 as a Promising Biomarker for Early Detection and Prognosis of Hepatocellular Carcinoma

## Supplementary Materials

**Table S1.** Correlation of ITGA6 with Markers of Immune Cells in TCGA LIHC dataset

| Description                             | Markers                | ITGA6 (LIHC, n=371) |          |
|-----------------------------------------|------------------------|---------------------|----------|
|                                         |                        | Corr                | P value  |
| T cell (general)                        | CD3D                   | 0.021               | 6.96e-01 |
|                                         | CD3E                   | 0.100               | 6.41e-02 |
|                                         | CD3G                   | 0.27                | 3.69e-07 |
|                                         | CD2                    | 0.065               | 2.26e-01 |
| Cytotoxic T cell                        | CD8A                   | 0.122               | 2.37e-02 |
|                                         | CD8B                   | 0.03                | 5.75e-01 |
| Regulatory T cell (Treg)                | IL2RA                  | 0.23                | 1.59e-05 |
|                                         | ENTPD1                 | 0.451               | 1.07e-18 |
|                                         | FoxP3                  | 0.212               | 7.23e-05 |
|                                         | CCR8                   | 0.378               | 3.87e-13 |
| Natural Killer (NK) cell                | CD56 ( <u>NCAM1</u> )  | 0.19                | 3.77e-04 |
|                                         | KLRD1                  | 0.085               | 1.16e-01 |
|                                         | NKG2A ( <u>KLRC1</u> ) | -0.004              | 9.48e-01 |
|                                         | NKG2D ( <u>KLRK1</u> ) | 0.011               | 8.37e-01 |
|                                         | <u>NCR1</u> (NKp46)    | 0.178               | 9.28e-04 |
|                                         | <u>NCR2</u> (NKp44)    | 0.064               | 2.38e-01 |
|                                         | <u>NCR3</u> (NKp30)    | -0.027              | 6.15e-01 |
| Myeloid-Derived Suppressor Cells (MDSC) | HLA-DRA                | 0.222               | 3.05e-05 |
|                                         | HLA-DRB1               | 0.083               | 1.26e-01 |

|                                |                 |        |          |
|--------------------------------|-----------------|--------|----------|
|                                | CD33            | 0.186  | 5.19e-04 |
|                                | CD11b (ITGAM)   | 0.28   | 1.25e-07 |
|                                | CD14 (negative) | -0.201 | 1.67e-04 |
|                                | IDO(IDO1)       | 0.226  | 2.2e-05  |
|                                | LOX             | 0.493  | 1.72e-22 |
|                                | S100A8          | 0.032  | 5.52e-01 |
|                                | S100A9          | 0.035  | 5.14e-01 |
|                                | CD80            | 0.278  | 1.56e-07 |
|                                | CD83            | 0.373  | 8.2e-13  |
| B cell                         | CD45 (PTPRC)    | 0.410  | 1.87e-15 |
|                                | CD19            | 0.051  | 3.49e-01 |
|                                | CD79A           | 0.042  | 4.34e-01 |
| Tumor Endothelial Cells (TECs) | CD34            | 0.288  | 5.12e-08 |
|                                | ITGB3           | 0.304  | 8.15e-09 |
|                                | ENG             | 0.028  | 6.05e-01 |
|                                | CXCR4           | 0.299  | 1.43e-08 |
|                                | PGF             | 0.159  | 3.02e-03 |
|                                | ANGPT2          | 0.400  | 1.17e-14 |

## Supplementary Figures

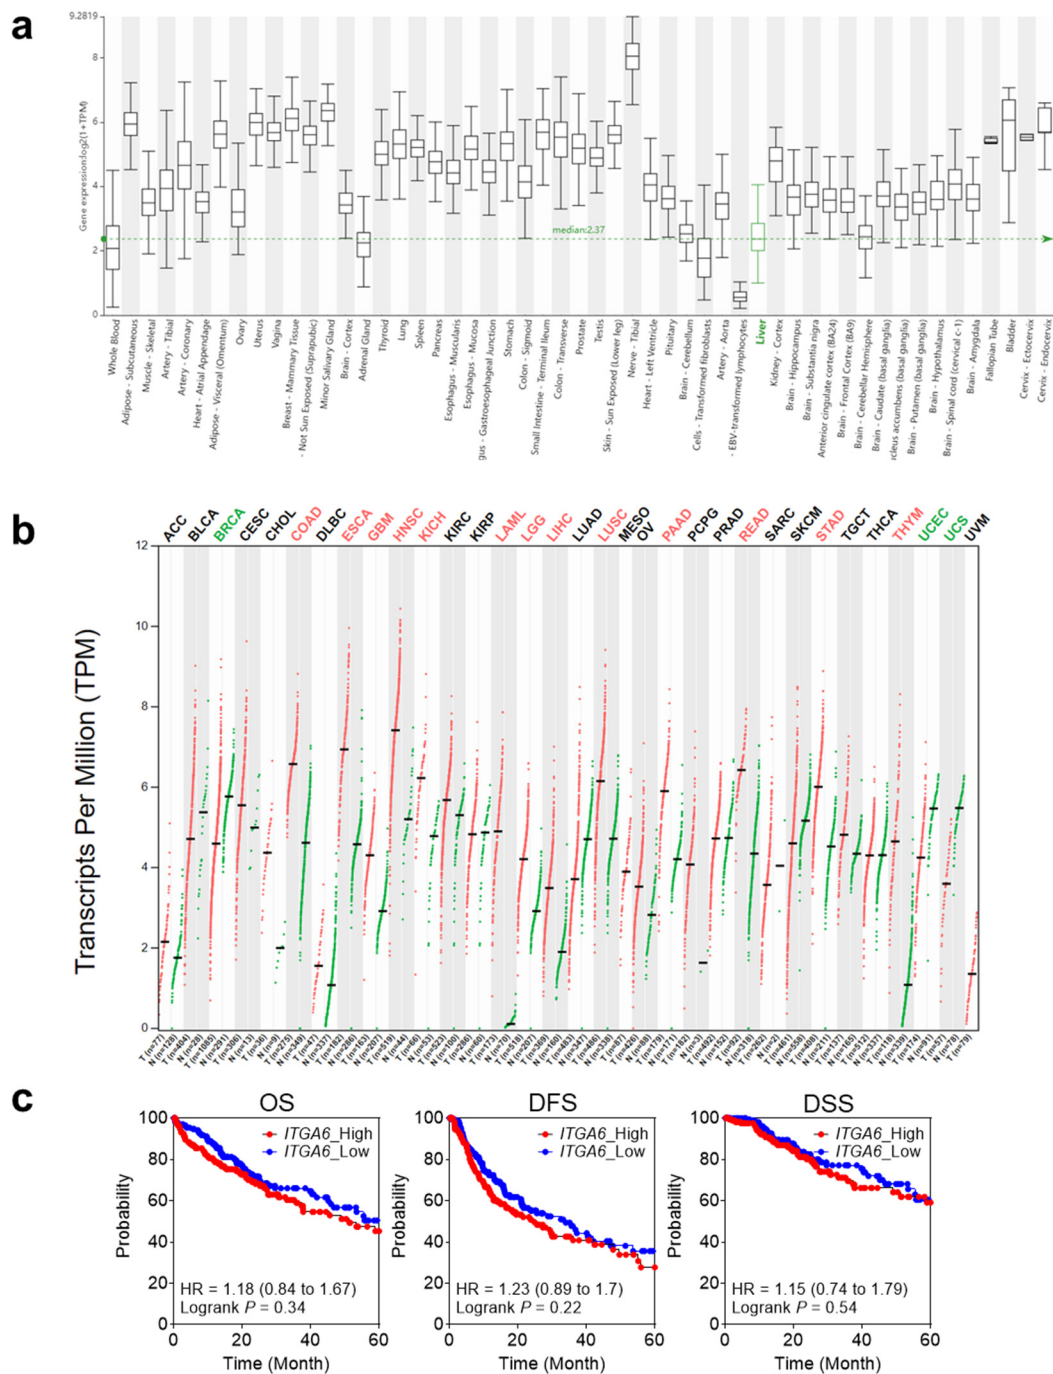

**Figure S1** Analysis of ITGA6 expression levels across various tissues and cancer types. (A) GTEx Box-plot analysis of ITGA6 expression in various types of normal tissues. The green line represents the median expression of ITGA6 in liver tissues. (B) The differences in expression levels of ITGA6 mRNA in different tumors and normal tissues from TCGA. (C)

The survival analysis of between the ITGA6\_High and \_Low groups. OS; overall survival, DFS; disease-free survival, DSS; disease-specific survival.

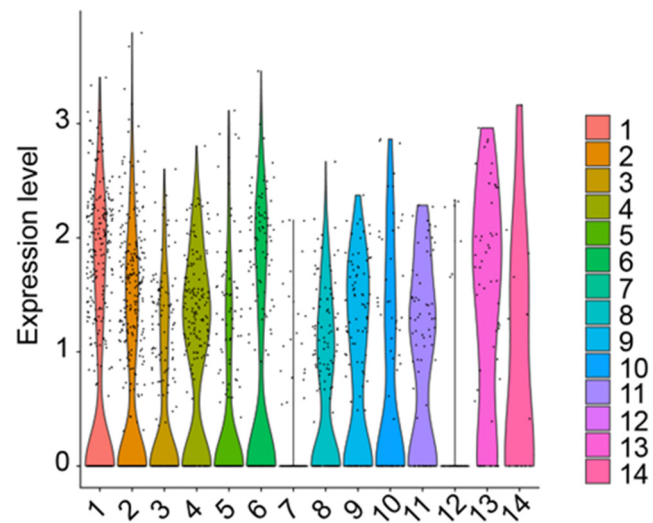

**Figure S2** Violin plot analysis of ITGA6 expression across the TECs numbered by cell clusters.

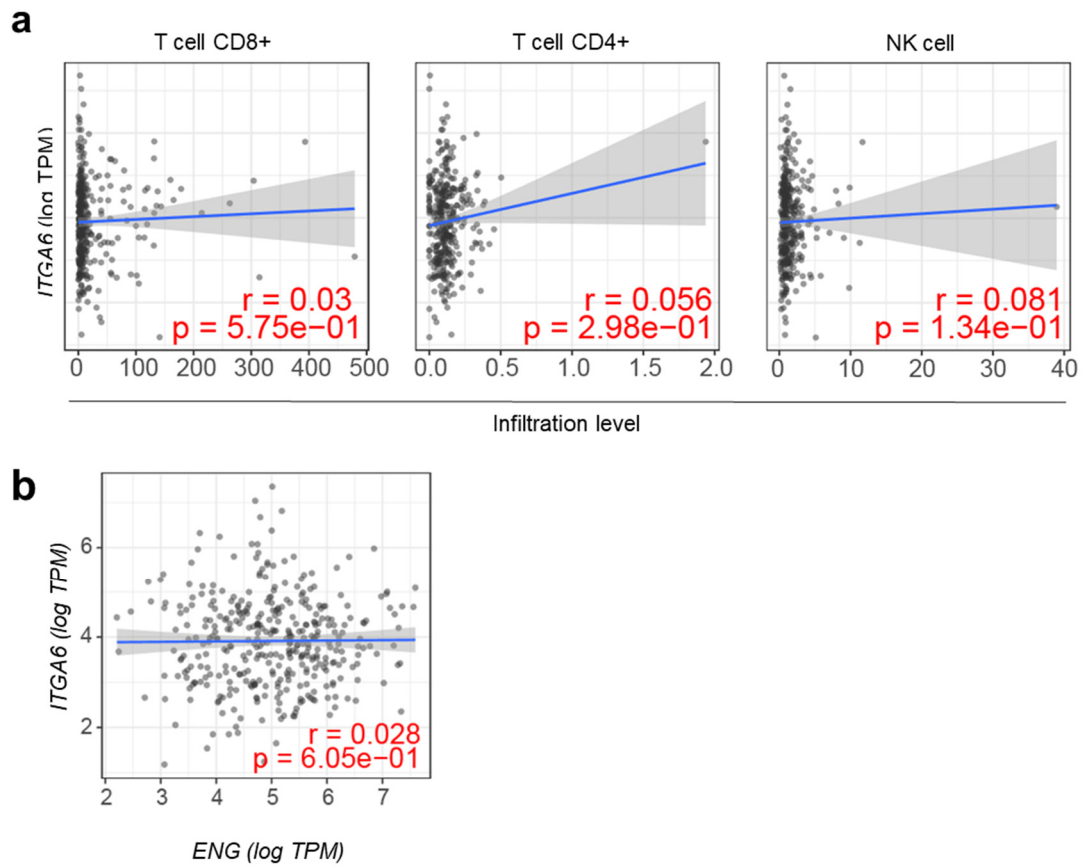

**Figure S3** Immune cell infiltration assessment based on ITGA6 expression using TIMER analysis. (A) The correlation analysis between ITGA6 and T cells with CD8, CD4 and NK cells. (B) The co-related expression analysis of the ENG gene with ITGA6.
